# Supplementary material for: Get Noticed and Die Trying: Signals, Sacrifice, and the Production of Face Time in Distributed Work
Source: Atypon-hosted journal article supplement (doi:10.1287/orsc.2018.1265), 2019-05-01

**Figure 1** Data Structure for Subsidiary Employees

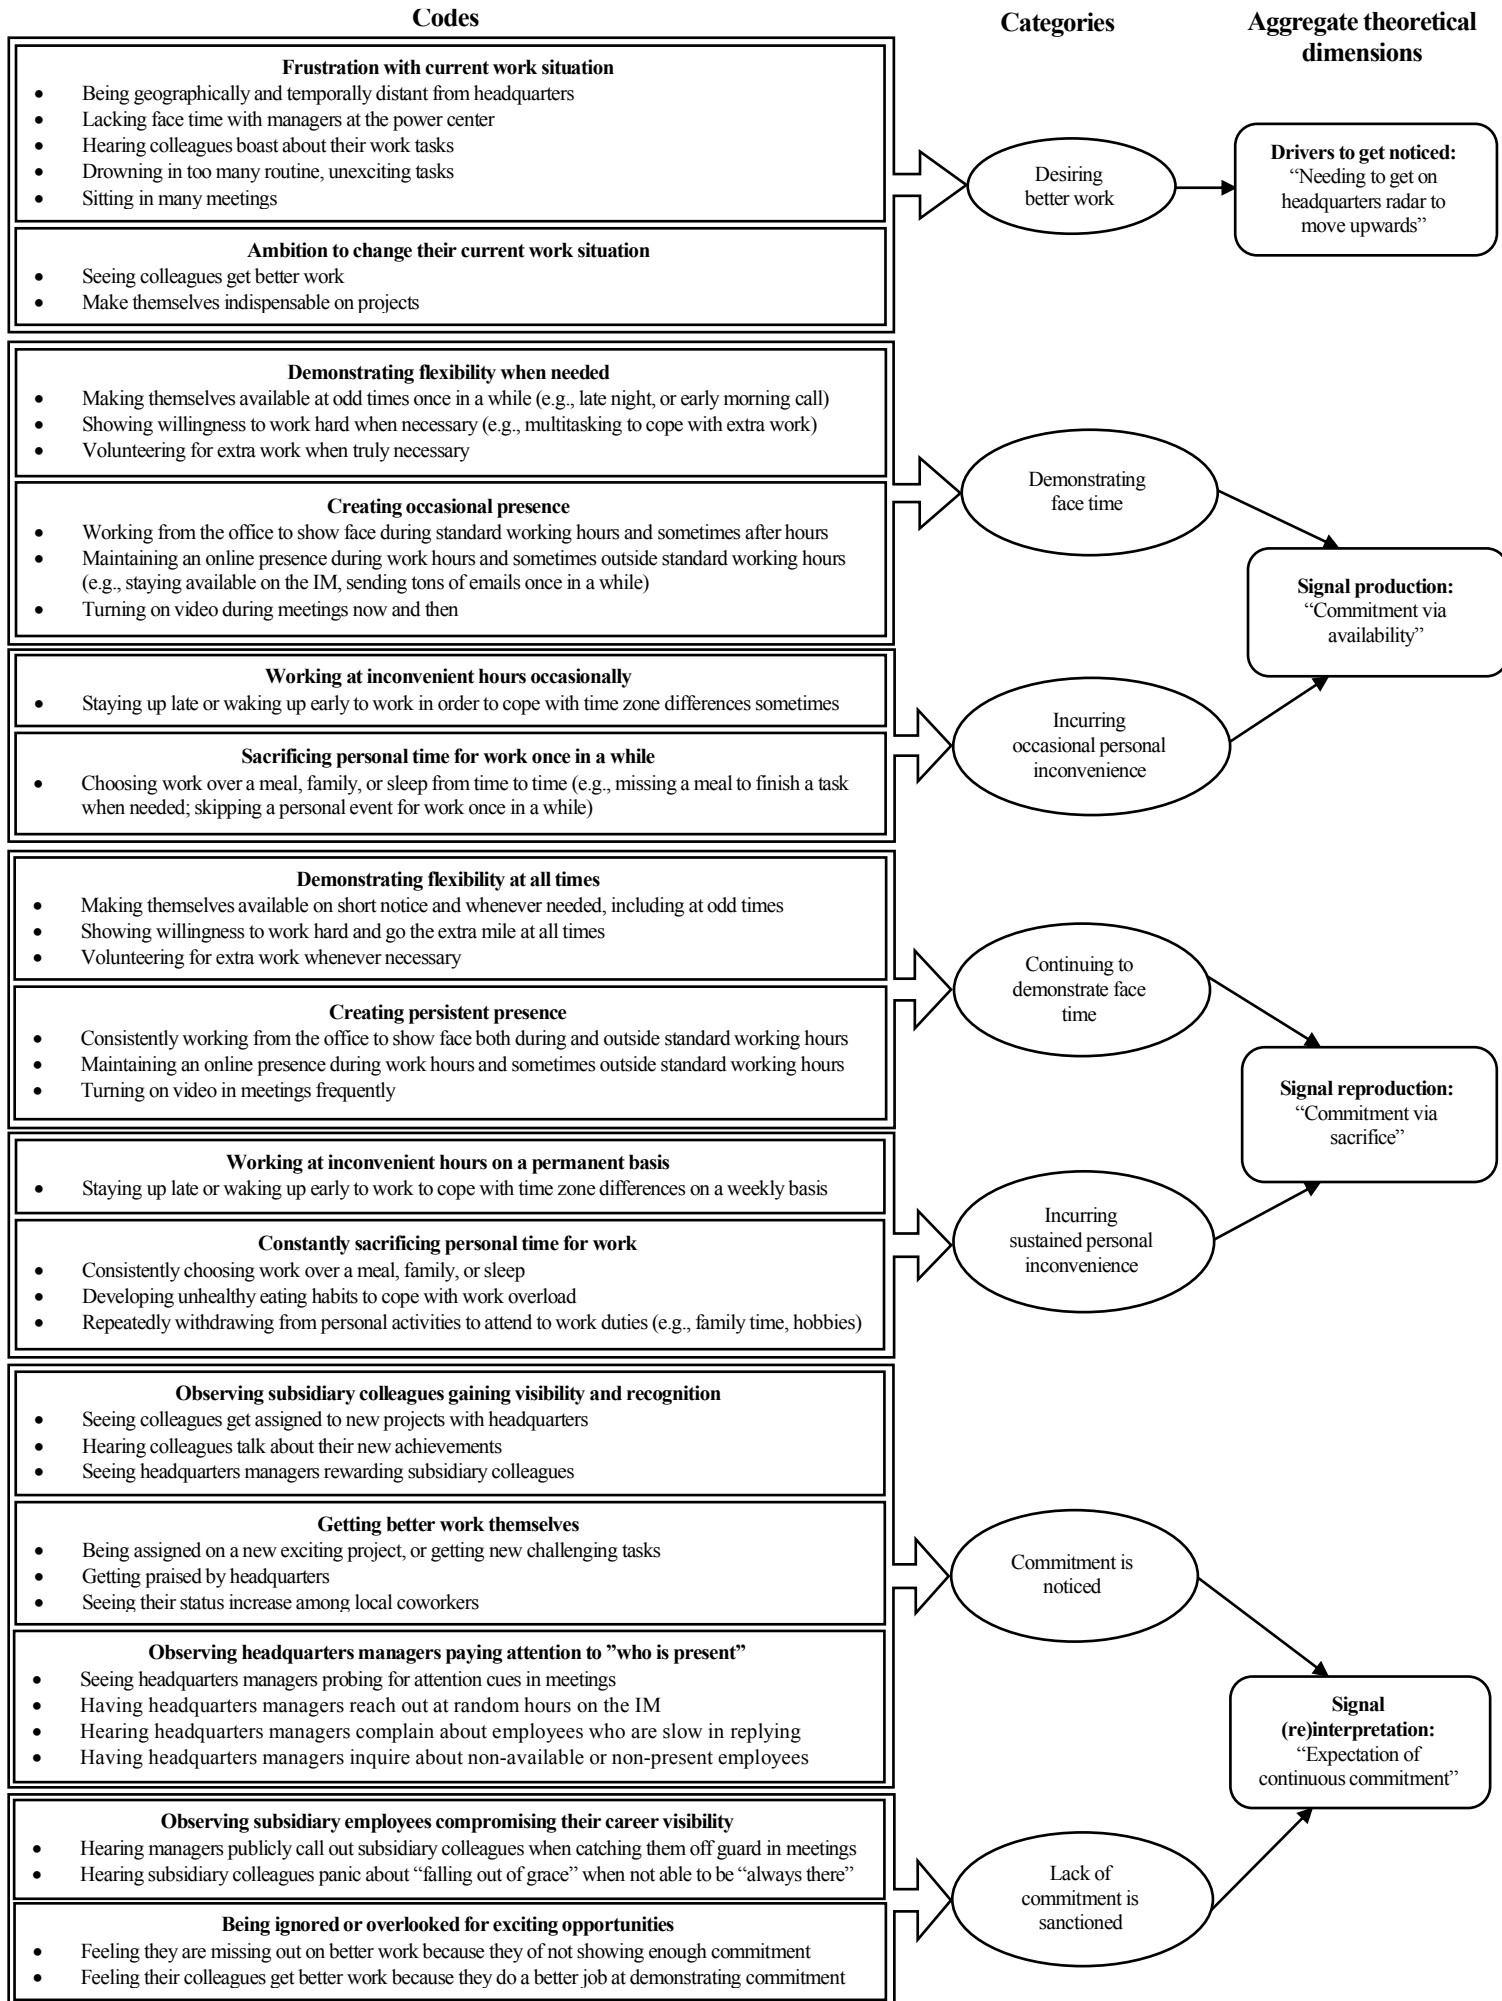

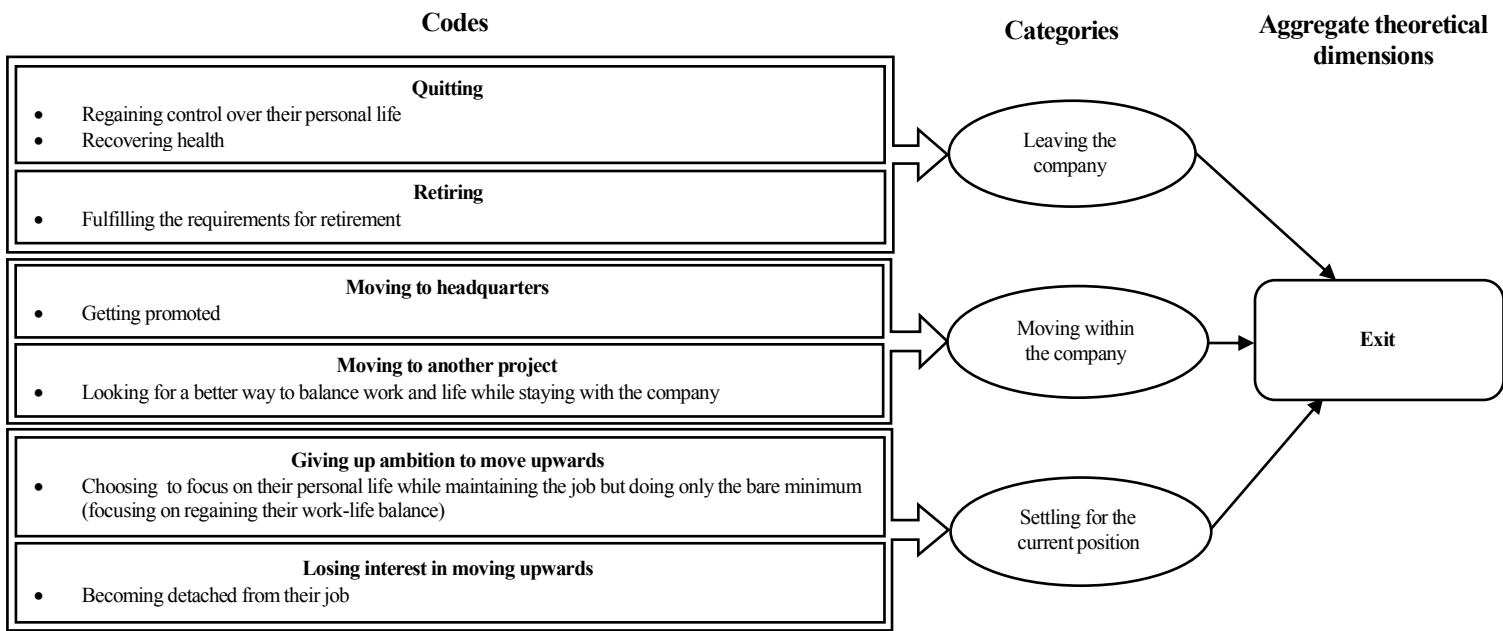

Figure 2 Data Structure for Headquarters Employees

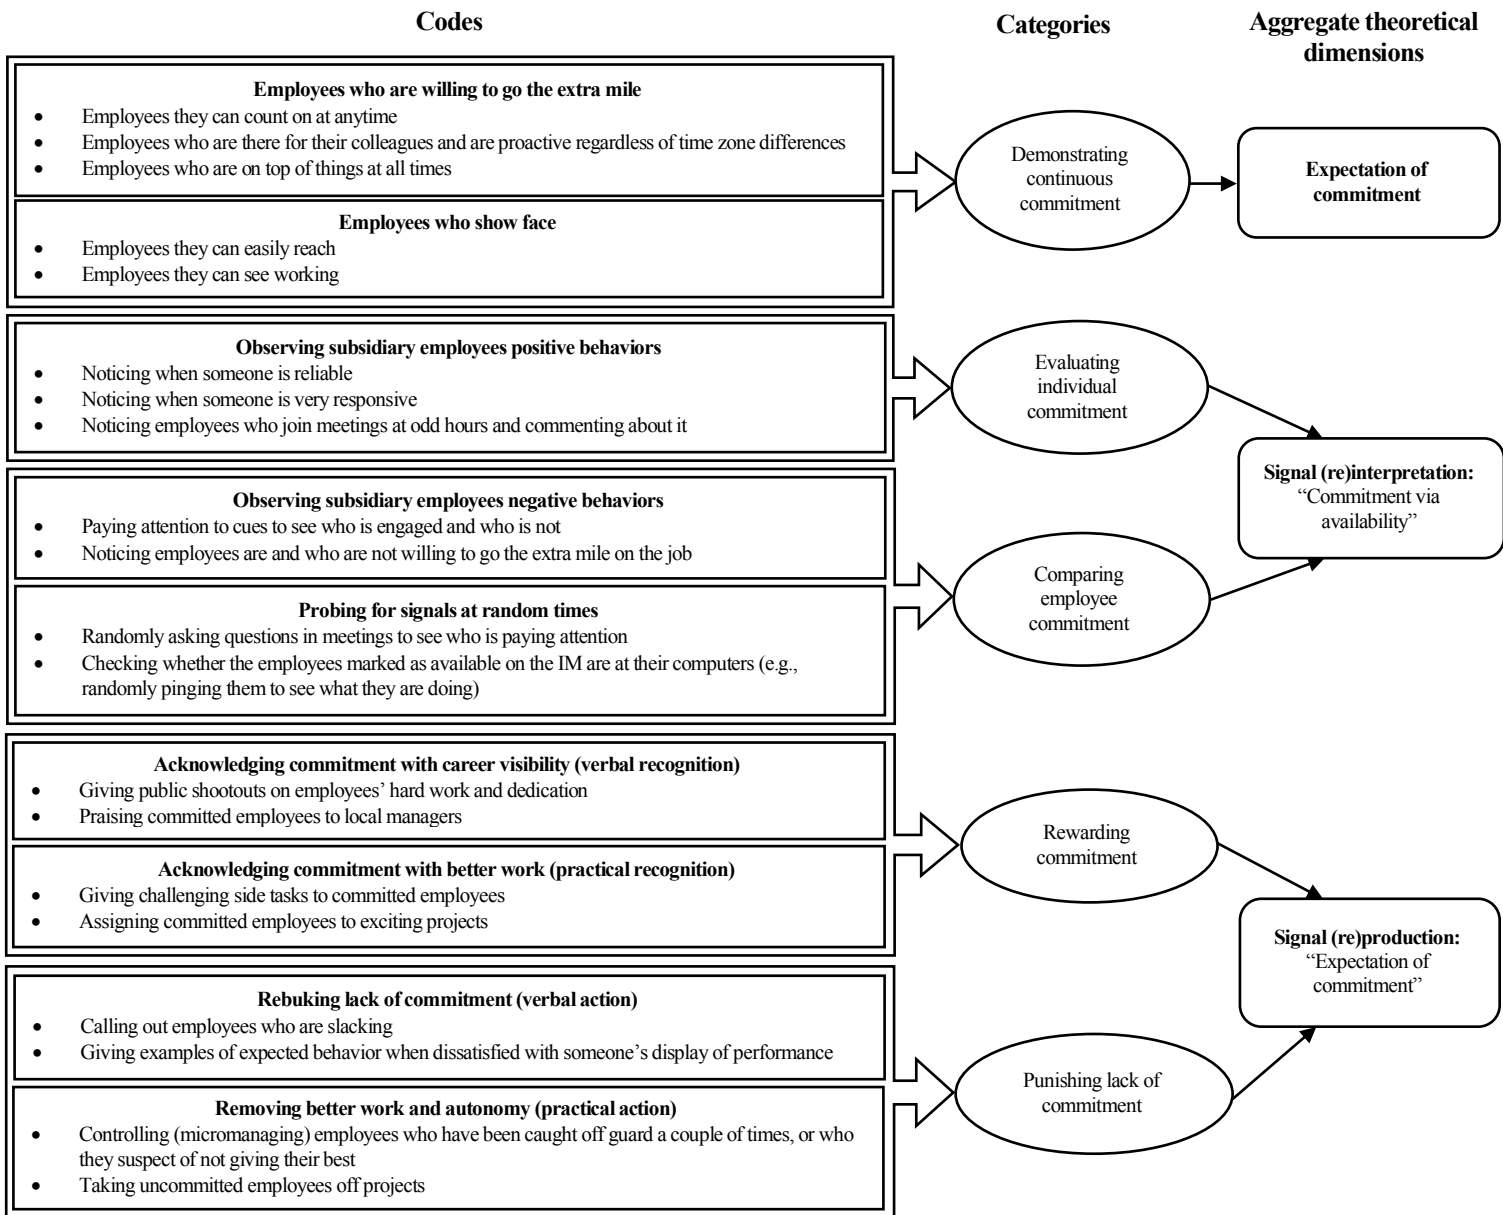

Supplement: orsc.2018.1265.sm1.pdf [file orsc.2018.1265.sm1.pdf]
